# Supplementary material
Source: PubMed Central journal article supplement (PMC6410955)

Figure 1E

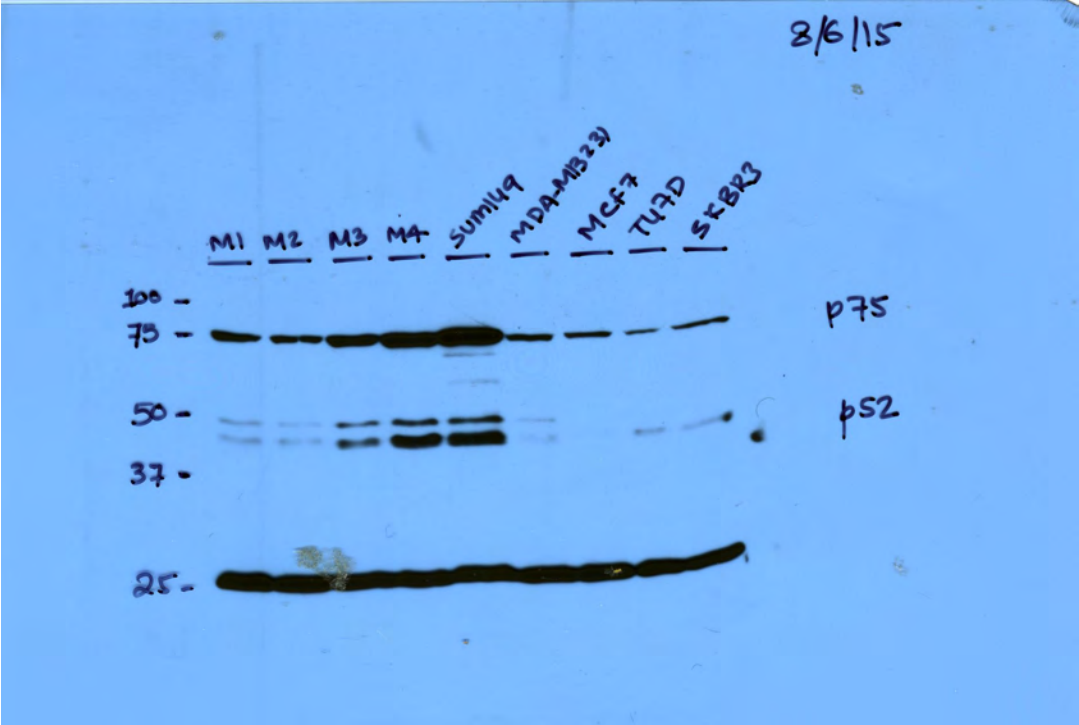

Figure 1E

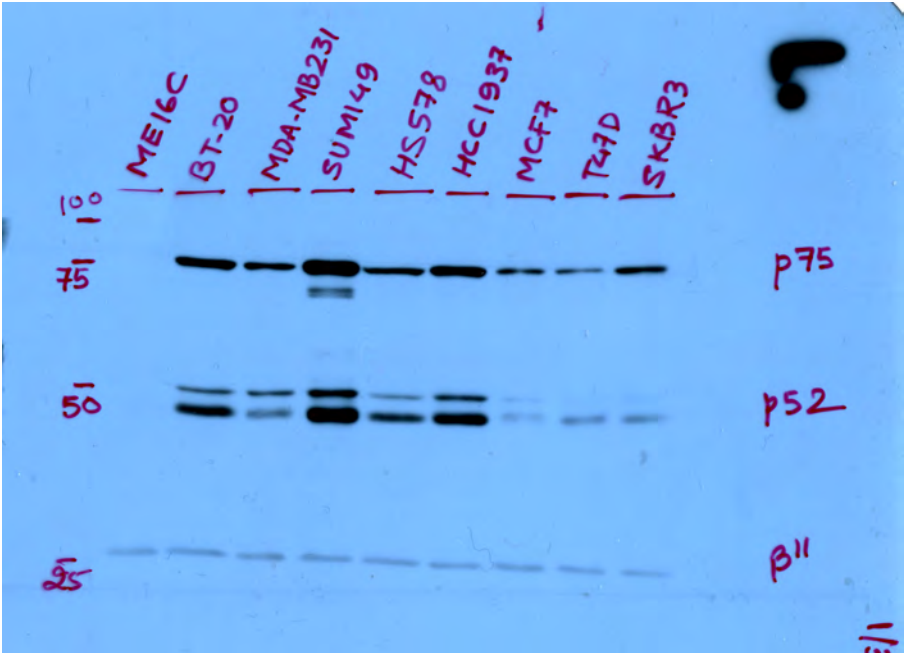

Supp. Figure 3

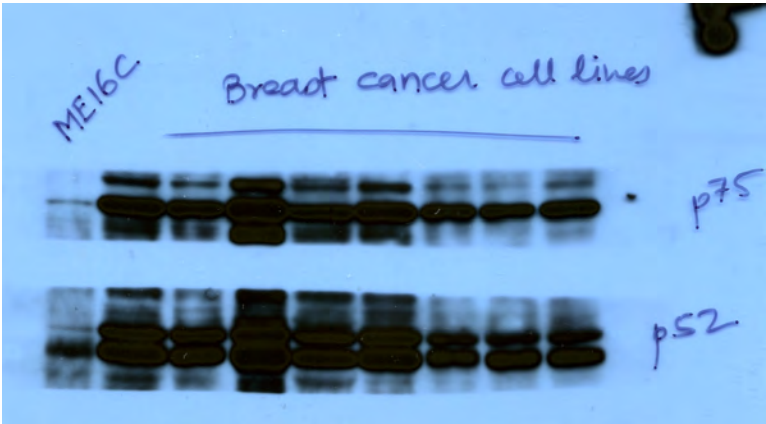

Figure 2A

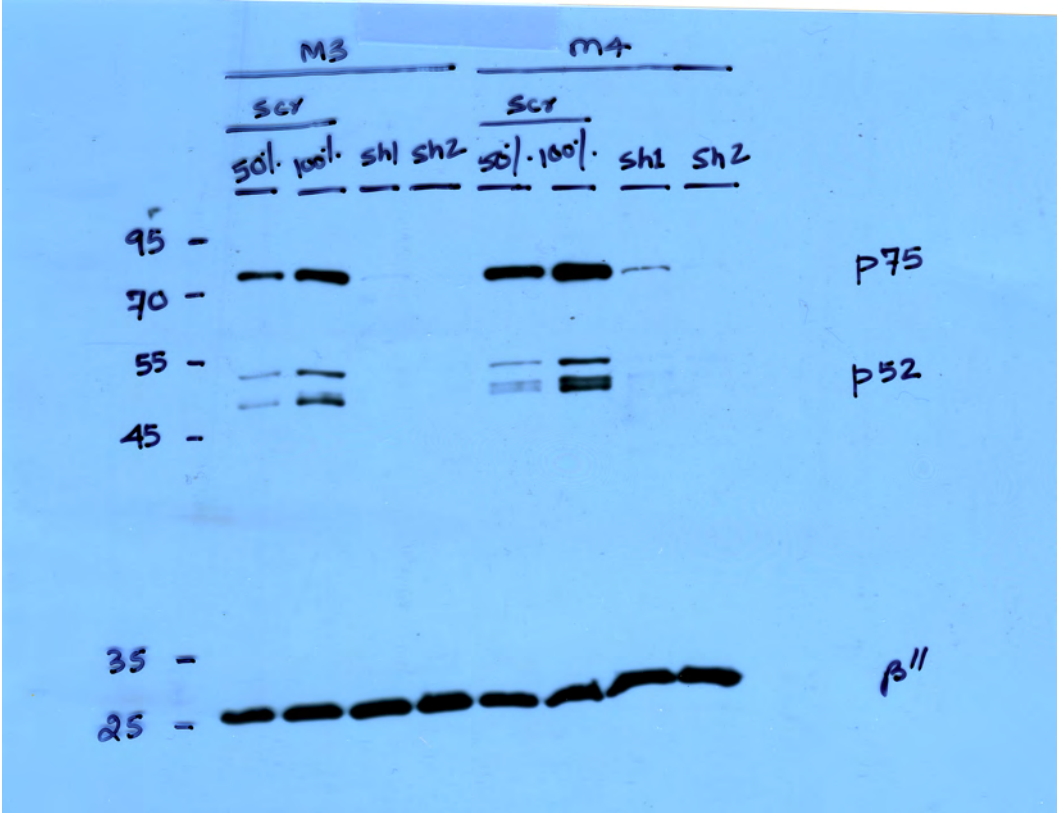

Figure 2A  
Low exposure for loading control

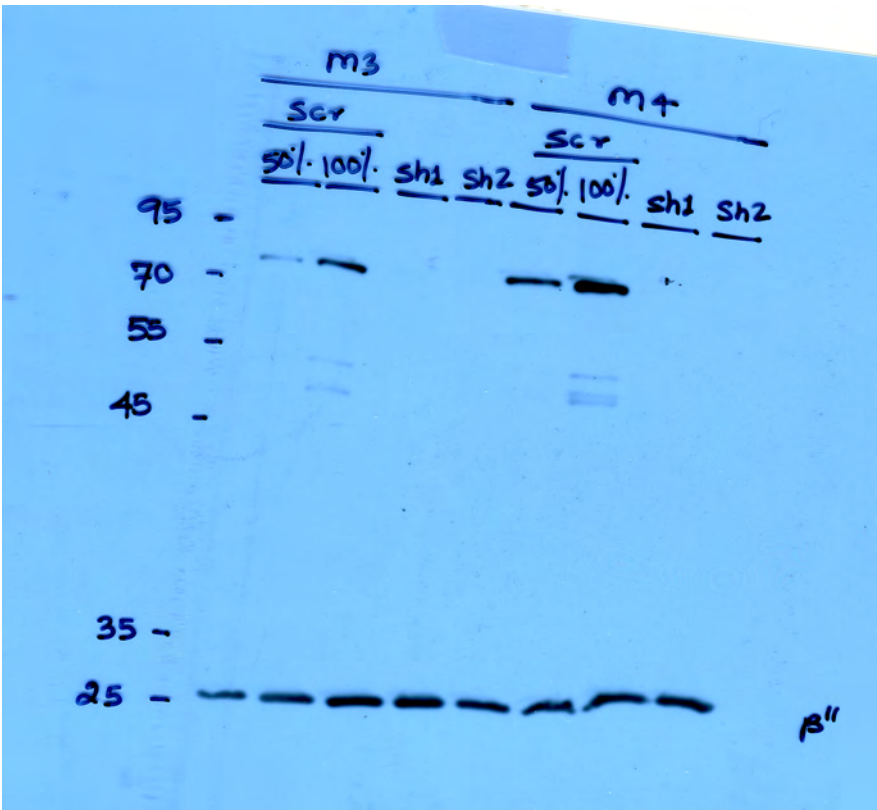

Figure 3A

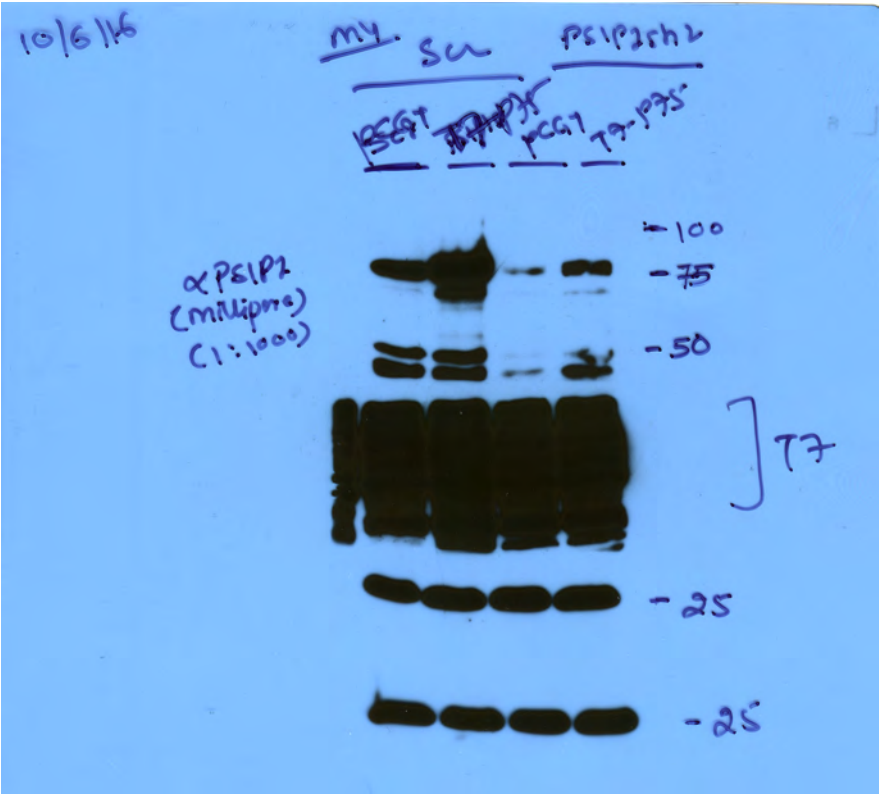

Figure 3A

Low exposure for loading control

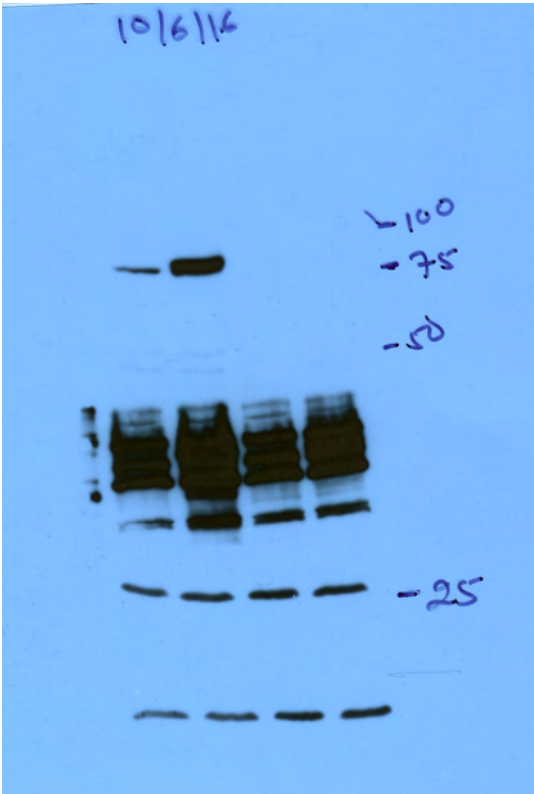

Figure 3D

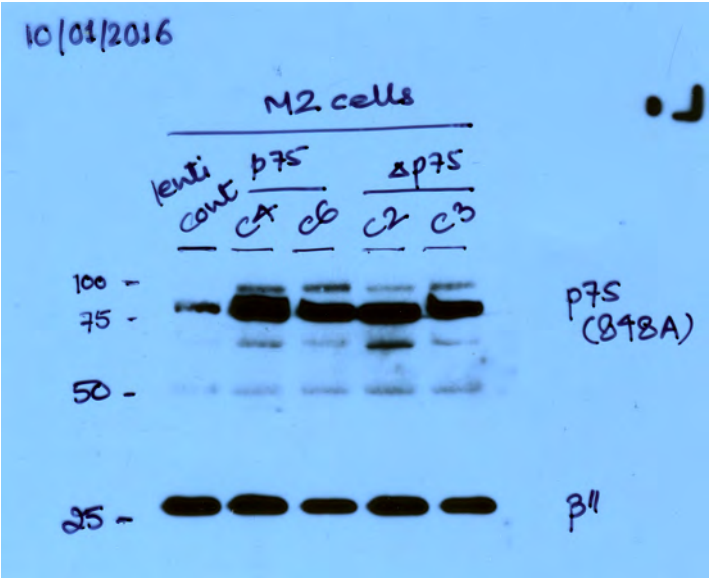

Figure 3D  
Low exposure for loading control

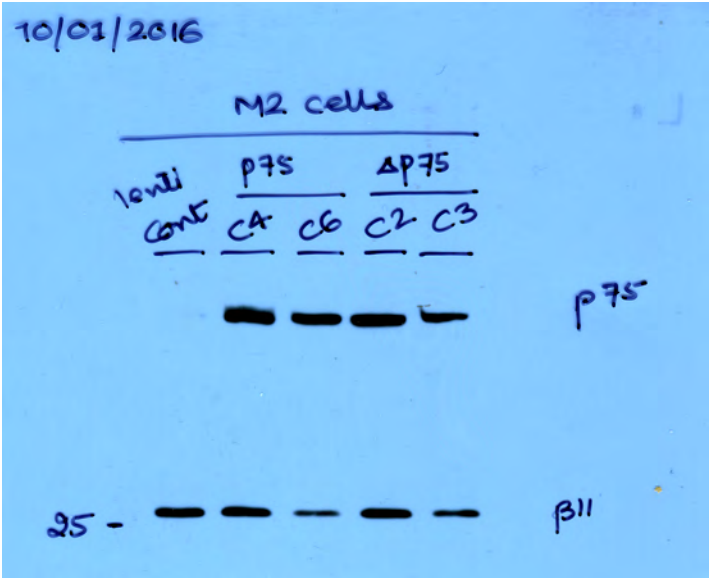

Figure 5C

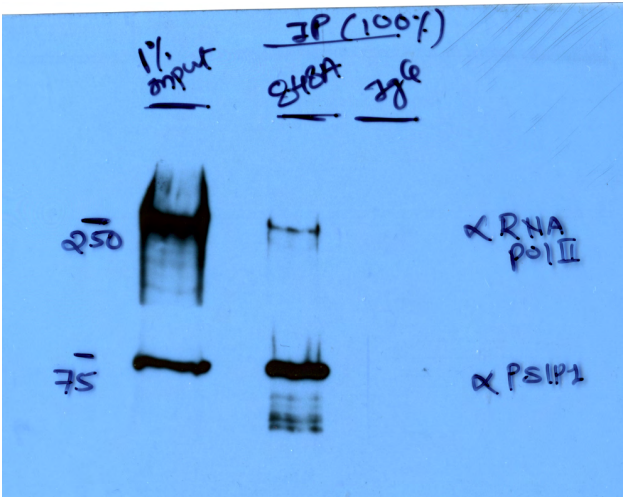

Figure 5E  
Low exposure for loading control

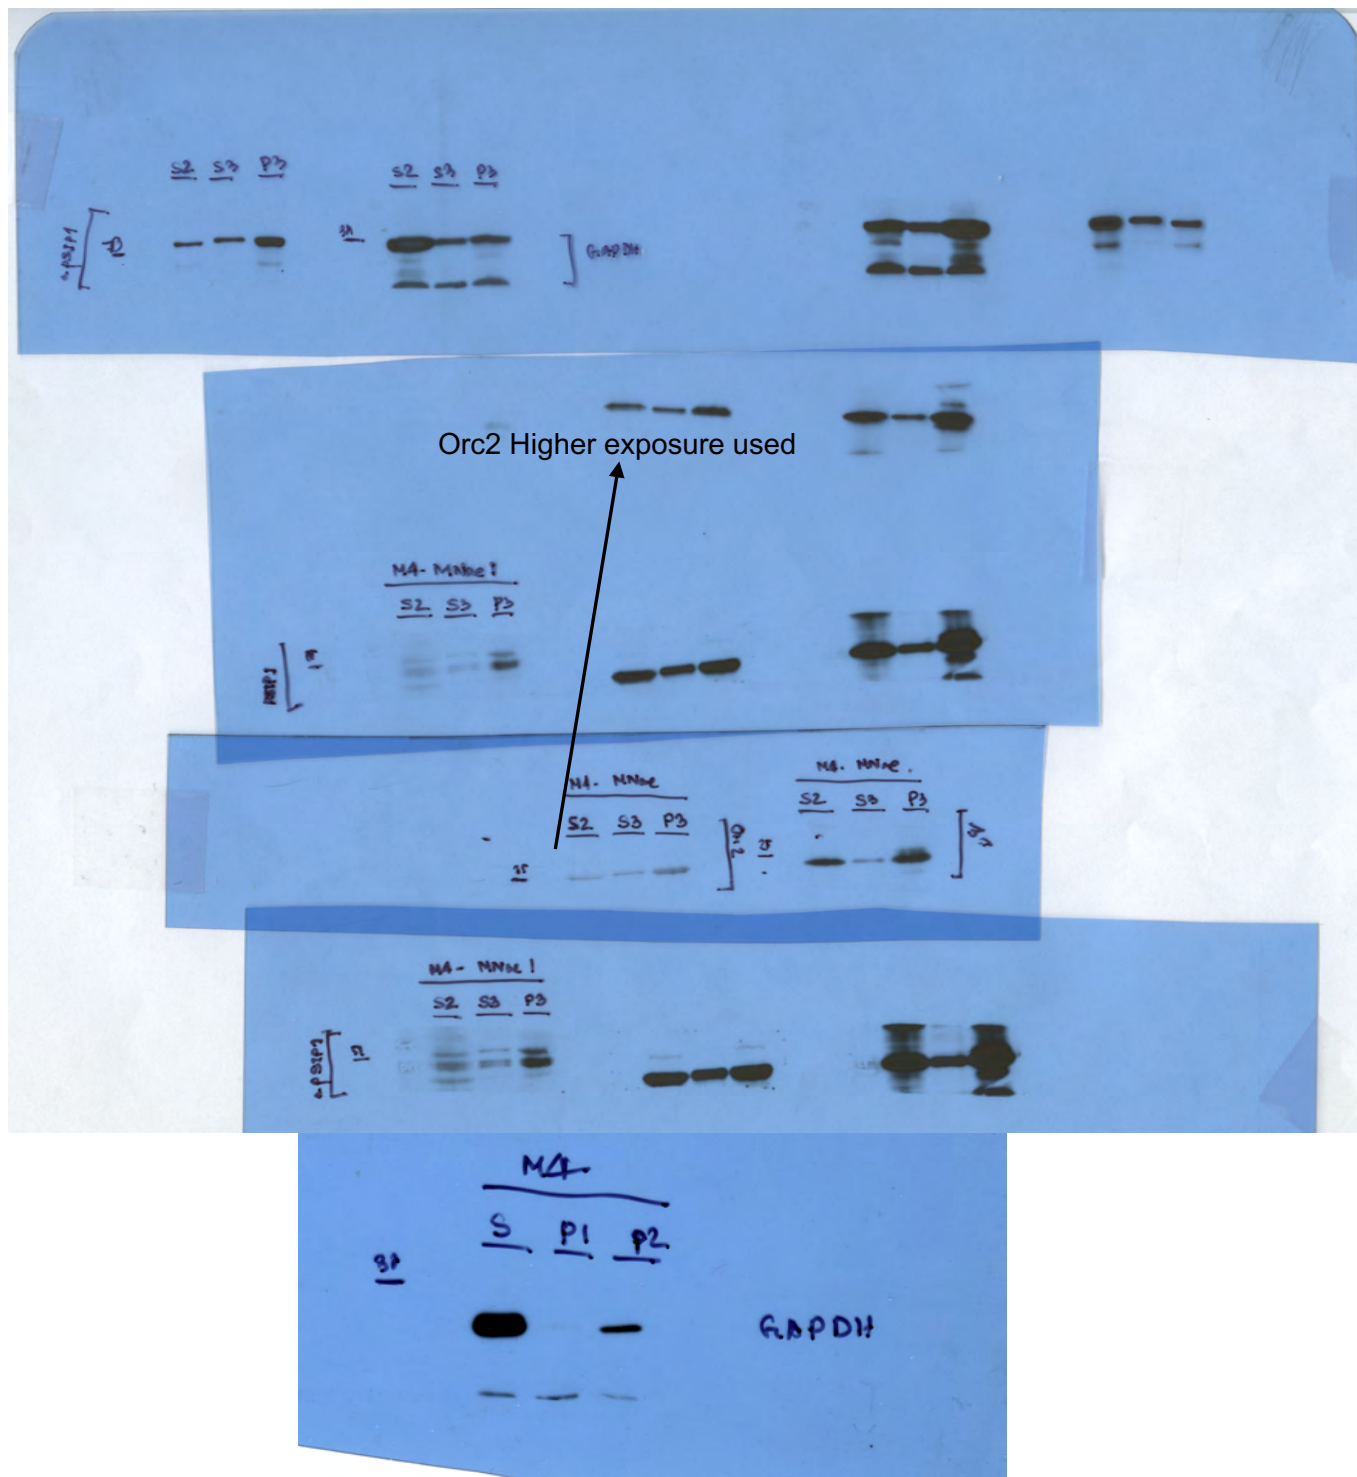

Supp. Figure 5A

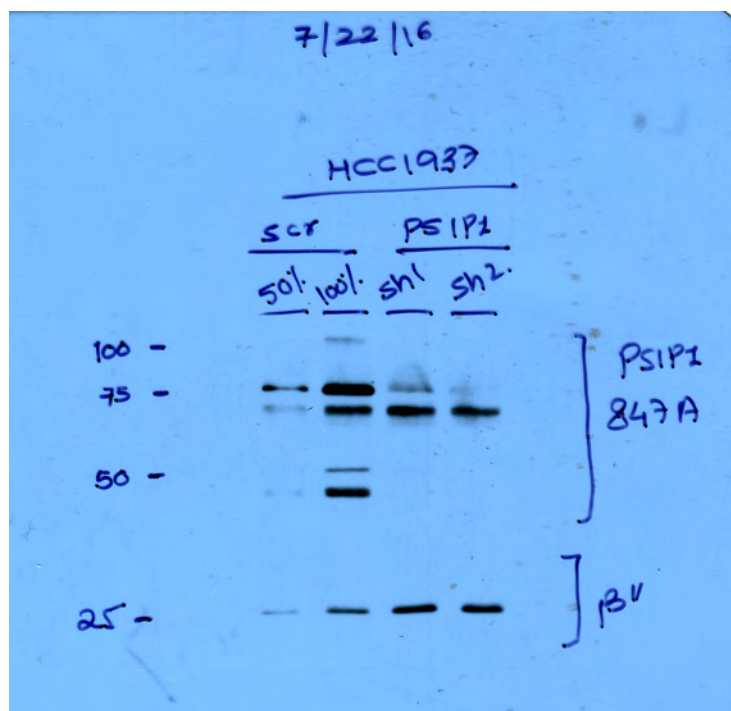

Supp. Figure 6A

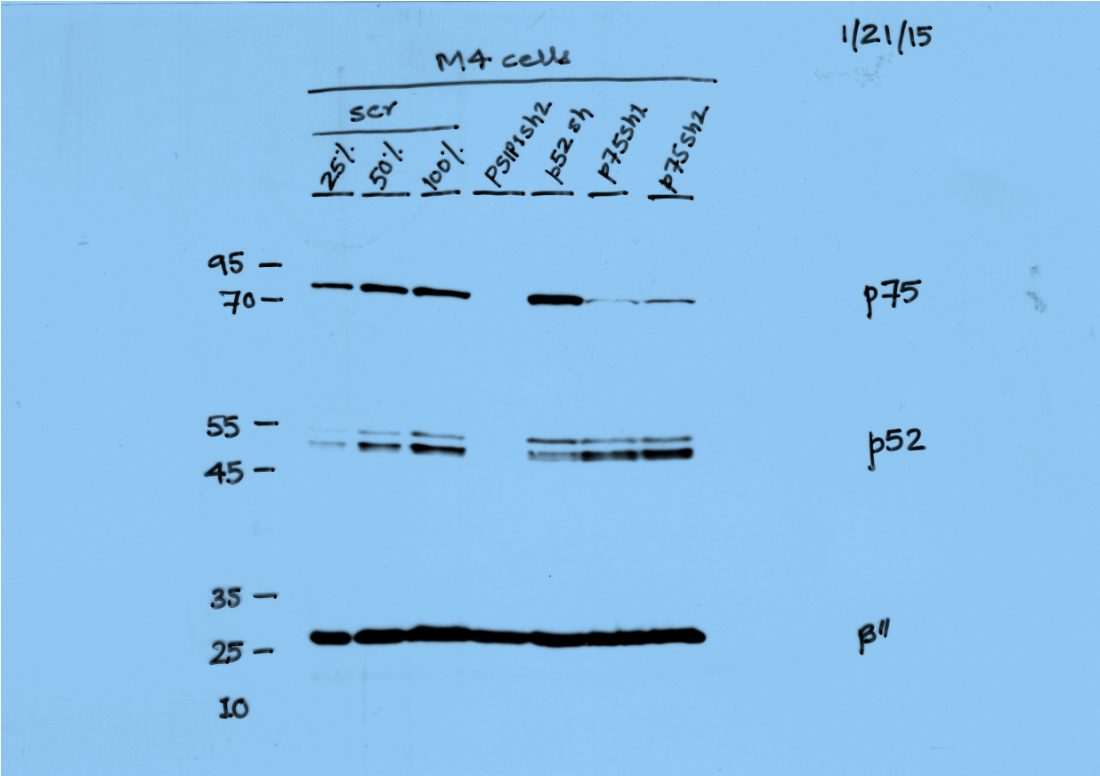

Supp. Figure 6A  
Low exposure for control

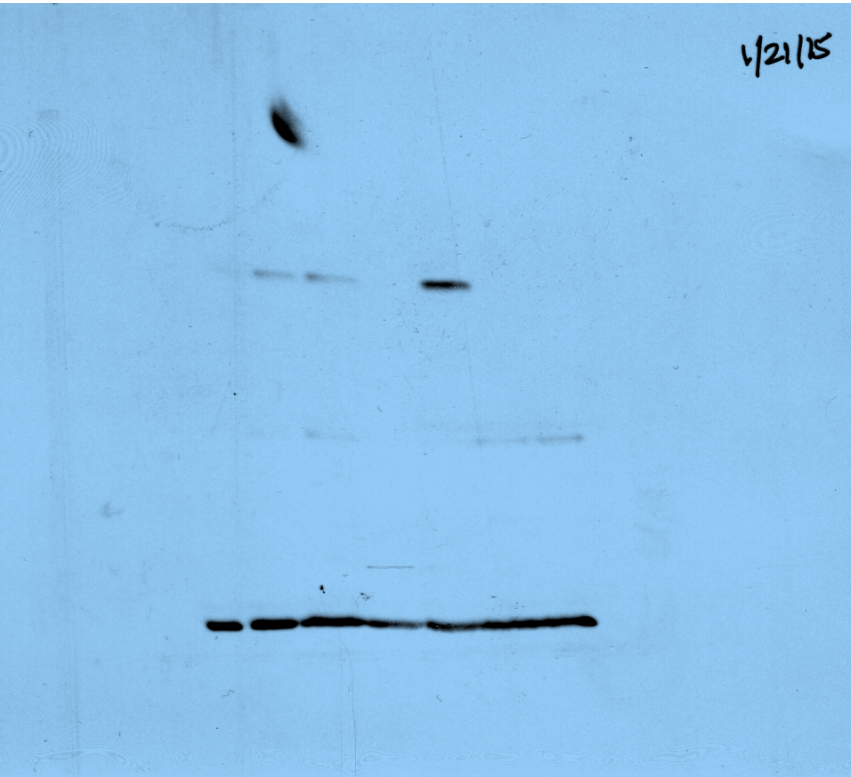

Supp. Figure 8A

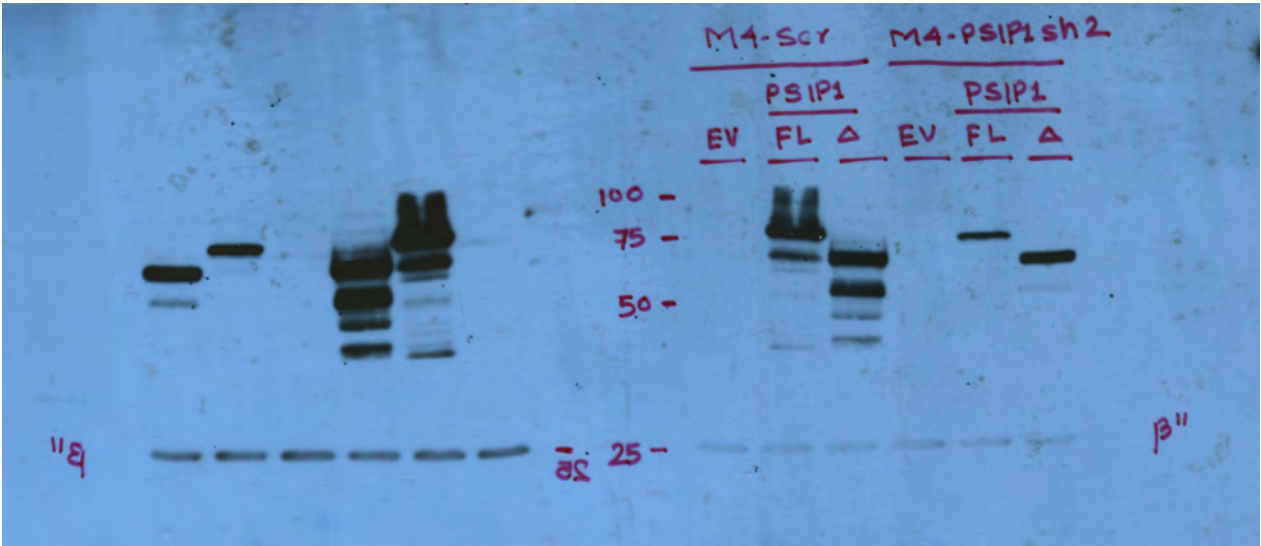

Supp. Figure 10A

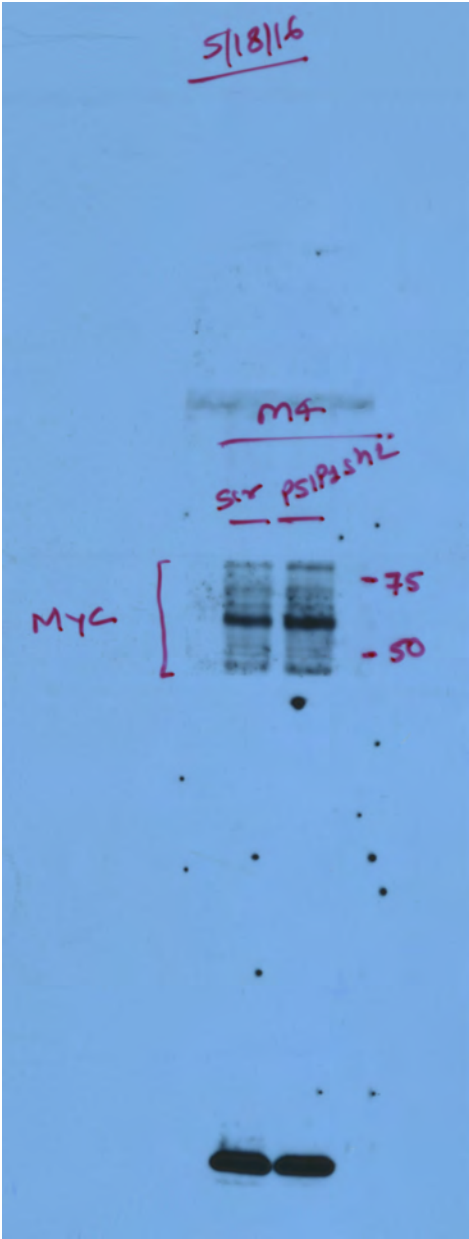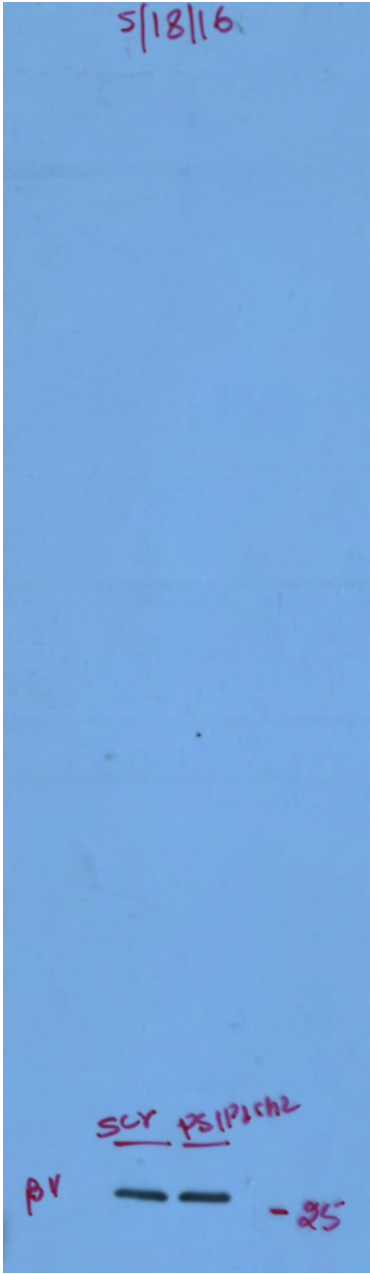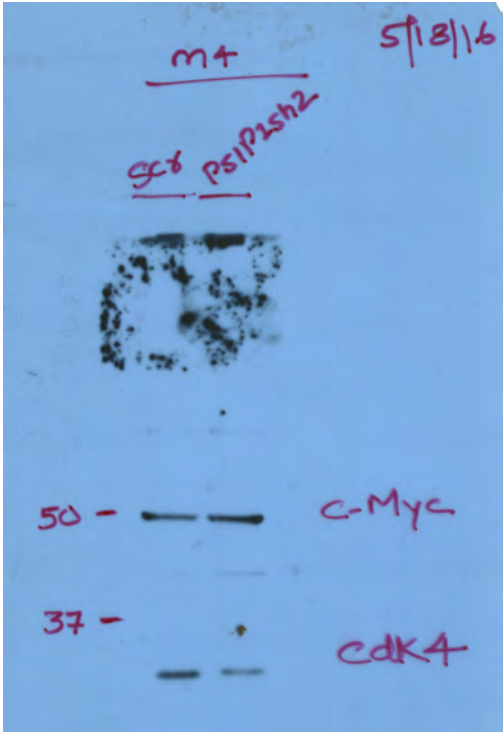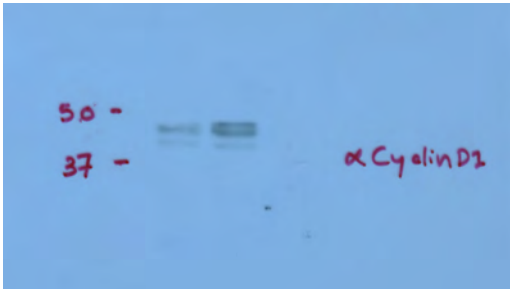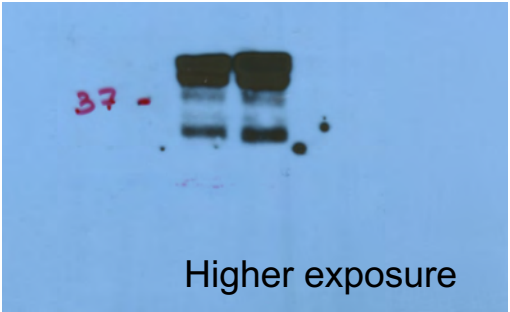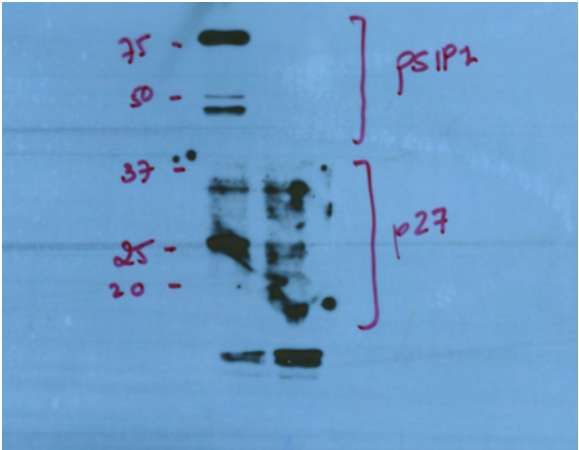

Supp. Figure 10 Ba

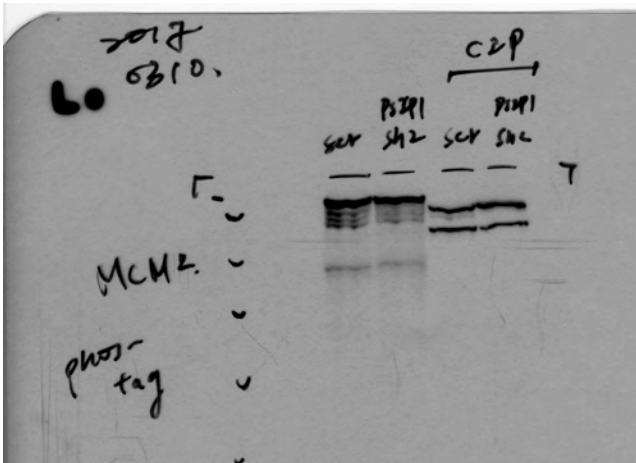

Supp. Figure 10 Bb

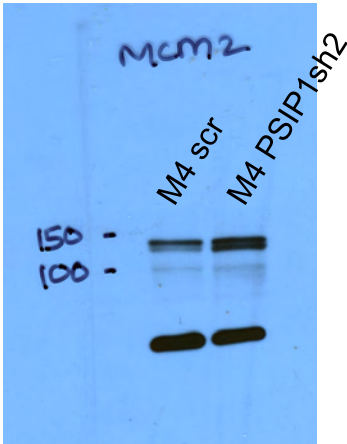

Supplement: bgx062_suppl_full_blots_reduced.pdf [file bgx062_suppl_full_blots_reduced.pdf]
